# Supplementary material
Source: PubMed Central journal article supplement (PMC1693802)
Supplement: pnas_0607786103_1.pdf [file pnas_0607786103_1.pdf]

## Supporting Text

**General:** All manipulations were carried out in degassed solvents using reagents of the highest commercially available purity. The  $^1\text{H}$  NMR spectra were assigned with the help of COSY, NOESY, HSQC and HMBC measurements. NMR spectra were referenced to the residual  $^1\text{H}$  or  $^{13}\text{C}$  signal of the solvent. All mass spectra were taken in degassed methanol.

**General procedure for the preparation of dimeric structures (Scheme 4) incorporating diamines C-E (Table 1):** Into an NMR tube with a Teflon screw cap were added diamine **C**, **D** or **E** (1 eq., 0.02 mmol), diformylpyridine **A** (2 eq., 0.04 mmol), 8-aminoquinoline **B** (2 eq., 0.04 mmol),  $\text{Cu}(\text{NCMe})_4\text{BF}_4$  (2 eq., 0.04 mmol) and  $\text{CD}_3\text{CN}$  (in the cases of **C** and **E**) or  $\text{CD}_3\text{OD}$  (in the case of **D**) (0.5 ml). The brown solution obtained were deoxygenated by three vacuum / argon fill cycles and heated overnight at  $50^\circ\text{C}$ .

### Characterization data for product complexes

Amine **C** (product **3**):

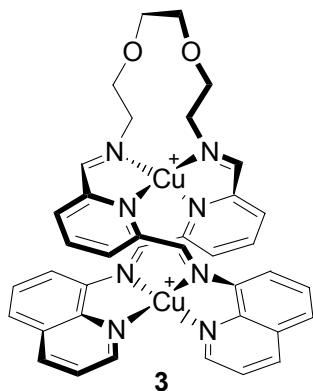

When this complex was prepared in an NMR tube following the general procedure detailed above, the  $^1\text{H}$  and  $^{13}\text{C}$  spectra were the same as reported in the Materials and Methods section of the main text.

Amine D:

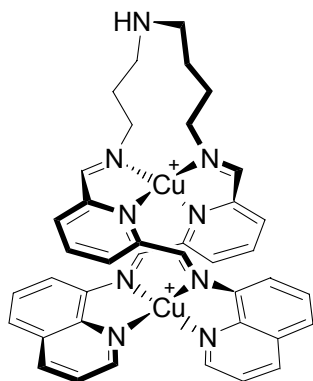

2 MeOH]<sup>+</sup>), 845.8 ([M + BF<sub>4</sub>]<sup>+</sup>).

<sup>1</sup>H NMR (400 MHz, 298 K, CD<sub>3</sub>OD): δ = 9.51 (s, 2H, quinoline imine), 8.37 (d, J = 8.0 Hz, 2H, 4-aminoquinoline), 8.17 (br s, 2H, 2-aminoquinoline), 8.00-8.20 (m, 8H, diamine imine, 5-aminoquinoline, 7-aminoquinoline, 3-pyridinedicarboxaldehyde next to the aminoquinoline), 7.94 (t, J = 8.0 Hz, 2H, 4-pyridinedicarboxaldehyde), 7.81 (t, J = 8.5 Hz, 2H, 6-aminoquinoline), 7.41 (br s, 2H, 3-aminoquinoline), 7.35 (d, J = 7.5 Hz, 2H, 5-pyridinedicarboxaldehyde next to the diamine), 2.7-4.0 (m, 12H, diamine). ESI-MS: *m/z* = 379.0 ([M]<sup>2+</sup>), 758.3 ([M - Cu +

Amine E:

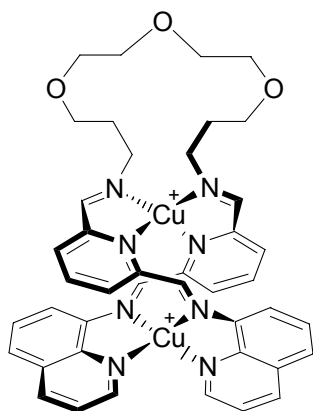

diamine), 1.40-1.60 (m, 4H, diamine). ESI-MS: *m/z* = 416.1 ([M]<sup>2+</sup>), 833.5 ([M - Cu + 2 MeOH]<sup>+</sup>), 919.7 ([M + BF<sub>4</sub>]<sup>+</sup>).

<sup>1</sup>H NMR (400 MHz, 298 K, CD<sub>3</sub>CN): δ = 9.30 (s, 2H, quinoline imine), 8.37 (dd, J = 8.5 Hz, J' = 1.0 Hz, 2H, 4-aminoquinoline), 8.23 (dd, J = 4.5 Hz, J' = 1.0 Hz, 2H, 2-aminoquinoline), 8.02 (m, 8H, diamine imine, 5-aminoquinoline, 7-aminoquinoline, 3-pyridinedicarboxaldehyde next to the aminoquinoline), 7.88 (t, J = 8.0 Hz, 2H, 4-pyridinedicarboxaldehyde), 7.79 (t, J = 8.0 Hz, 2H, 6-aminoquinoline), 7.41 (dd, J = 8.5 Hz, J' = 4.5 Hz, 2H, 3-aminoquinoline), 7.28 (d, J = 7.5 Hz, 2H, 5-pyridinedicarboxaldehyde, next to the diamine), 3.00-3.60 (m, 16H, diamine),

### General procedure for the preparation of dimeric structures (Scheme 4) incorporating anilines F-J (Table 1):

Into an NMR tube with a Teflon screw cap were added **F**, **G**, **H**, **I**, or **J** (1 eq., 0.02 mmol), 8-aminoquinoline **C** (1 eq.), Cu(NCMe)<sub>4</sub>BF<sub>4</sub> (1eq.), diformylpyridine **A** (1eq.) and solvent (0.5 ml) (CD<sub>3</sub>CN gave the best results with amines **F** and **G**, CD<sub>3</sub>OD with **H**, **I** and **J**). The brown homogeneous solution thus obtained was deoxygenated by three vacuum / argon fill cycles and

heated overnight at 50°C. The next morning a brown precipitate was observed to have formed. The supernatant was removed by filtration through a glass fiber plug in a Pasteur pipette and the precipitate was washed with freshly distilled dichloromethane (2 × 2 ml) (no washing was carried out in the case of **I**). The brown microcrystalline product was dried under vacuum.

Amine **F**:

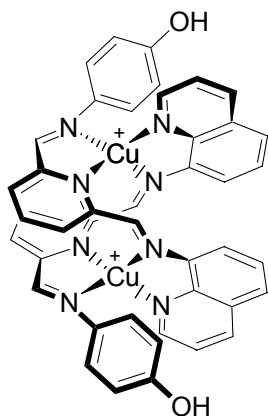

(+ Head to Head isomer)

**Head-to-tail:**  $^1\text{H}$  NMR (500 MHz, 298 K, DMSO):  $\delta$  = 9.95 (s, 2H, -OH), 9.09 (s, 2H, quinoline imine), 8.86 (s, 2H, aniline imine), 8.52 (d,  $J$  = 8.0 Hz, 2H, 4-aminoquinoline), 8.41 (d,  $J$  = 4.0 Hz, 2H, 2-aminoquinoline), 8.04 (t,  $J$  = 8.0 Hz, 2H, 4-pyridinedicarboxaldehyde), 7.97 (d,  $J$  = 7.5 Hz, 2H, 3-pyridinedicarboxaldehyde next to the aniline), 7.74 (d,  $J$  = 8.0 Hz, 2H, 5-aminoquinoline), 7.66 (dd,  $J$  = 8.0 Hz,  $J'$  = 4.5 Hz, 2H, 3-aminoquinoline), 7.43 (d,  $J$  = 7.5 Hz, 2H, 3-pyridinedicarboxaldehyde next to the quinoline), 7.25 (t,  $J$  = 7.50 Hz, 2H, 6-aminoquinoline), 7.11 (d,  $J$  = 7.5 Hz, 2H, 7-aminoquinoline), 6.84 (d,  $J$  = 8.5 Hz, 4H, aniline next to the -OH), 6.67 (d,  $J$  = 8.0 Hz, 4H, aniline next to the imine).  $^{13}\text{C}$  NMR (125.77 MHz, 298 K, DMSO):  $\delta$  = 158.78, 155.98, 154.34, 150.37, 149.93, 149.19, 141.39, 140.22, 138.32, 137.51, 136.82, 129.05, 128.93, 128.58, 128.06, 126.96, 123.96, 123.73, 117.18, 115.93. **Head-to-head:**  $^1\text{H}$  NMR (500 MHz, 298 K, DMSO):  $\delta$  = 10.05 (s, 2H, -OH), 9.20 (s, 2H, quinoline imine), 8.66 (s, 2H, aniline imine), 8.53 (d,  $J$  = 8.50 Hz, 2H, 4-aminoquinoline), 8.33 (d,  $J$  = 4.0 Hz, 2H, 2-aminoquinoline), 8.16 (d,  $J$  = 8.0 Hz, 2H, 5-aminoquinoline), 8.00 (overlapping signals, 2H, 4-pyridinedicarboxaldehyde, 2H, 3-pyridinedicarboxaldehyde next to the aminoquinoline), 7.84 (t,  $J$  = 8.0 Hz, 2H, 6-aminoquinoline), 7.68 (overlapping signal, 2H, 7-aminoquinoline), 7.53 (d,  $J$  = 6.5 Hz, 2H, 3-aminoquinoline), 6.90 (d,  $J$  = 8.0 Hz, 4H, aniline next to the -OH), 6.67 (overlapping signal, 4H, aniline next to the imine). ESI-MS:  $m/z$  = 415.4 ( $[\text{M}]^{2+}$ ), 831.3 ( $[\text{M} - \text{Cu} + 2 \text{MeOH}]^+$ ), 919.5 ( $[\text{M} + \text{BF}_4]^+$ ).

Amine **G**:

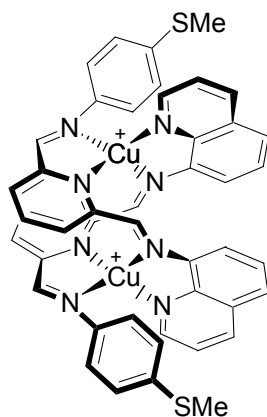

(+ Head to Head isomer)

When this complex was prepared in an NMR tube following the general procedure detailed above, the  $^1\text{H}$  and  $^{13}\text{C}$  spectra were the same as reported in the Materials and Methods section of the main text.

Amine **H**:

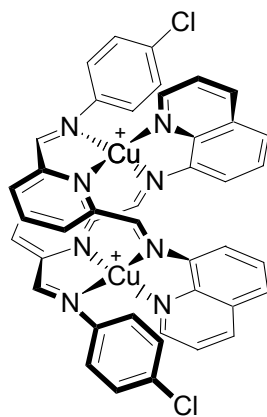

(+ Head to Head isomer)

$^1\text{H}$  NMR (400 MHz, 298 K, DMSO) **Head-to-tail**:  $\delta = 9.14$  (s, 2H, quinoline imine), 9.00 (s, 2H, aniline imine), 8.46 (d,  $J = 8.5$  Hz, 2H, 4-aminoquinoline), 8.38 (d,  $J = 3.5$  Hz, 2H, 2-aminoquinoline), 7.16 (t,  $J = 8.0$  Hz, 2H, 4-pyridinedicarboxaldehyde), 8.08 (d,  $J = 7.0$  Hz, 2H, 3-pyridinedicarboxaldehyde next to the aniline), 7.76 (d,  $J = 8.0$  Hz, 2H, 5-aminoquinoline), 7.67 (dd,  $J = 8.5$  Hz,  $J' = 4.5$  Hz, 2H, 3-aminoquinoline), 7.55 (d,  $J = 7.5$  Hz, 2H, 3-pyridinedicarboxaldehyde next to the quinoline), 7.37 (d,  $J = 8.5$  Hz, 4H, aniline next to the -Cl), 7.27 (t,  $J = 8.0$  Hz, 2H, 6-aminoquinoline), 7.13 (d,  $J = 7.5$  Hz, 2H, 7-aminoquinoline), 6.92 (d,  $J = 9.0$  Hz, 4H, aniline next to the imine). **Head-to-head**:  $\delta = 9.31$  (s, 2H, quinoline imine), 8.90 (s, 2H, aniline imine), 8.55 (d,  $J = 9.0$  Hz, 2H, 4-aminoquinoline), 8.38 (overlapping signal, 2H, 2-aminoquinoline), 8.18 (d,  $J = 8.0$  Hz, 2H, 5-aminoquinoline), 8.05 (overlapping signal, 2H, 4-pyridinedicarboxaldehyde, 2H, 3-pyridinecarboxaldehyde next to the quinoline), 7.86 (m, 2H, 6-aminoquinoline), 7.78 (overlapping signal, 2H, 7-aminoquinoline), 7.66 (overlapping signal, 2H, 3-pyridinedicarboxaldehyde next to the quinoline), 7.48 (dd,  $J = 8.5$  Hz,  $J' = 4.5$  Hz, 2H, 2-aminoquinoline), 7.38 (overlapping signal, 4H, aniline next to the -Cl), 7.01 (d,  $J = 8.5$  Hz, 4H, aniline next to the imine). ESI-MS:  $m/z = 434.0$  ( $[\text{M}]^{2+}$ ), 803.0 ( $[\text{M} - \text{Cu}]^+$ ), 955.7 ( $[\text{M} + \text{BF}_4]^+$ ).

Amine I:

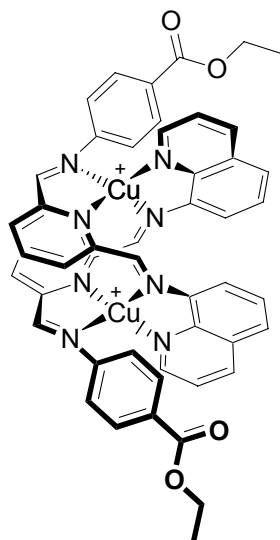

(+ Head to Head isomer)

$^1\text{H}$  NMR (400 MHz, 298 K, DMSO) **Head-to-tail:**  $\delta$  = 9.14 (s, 2H, quinoline imine), 9.07 (s, 2H, aniline imine), 8.47 (d,  $J$  = 7.5 Hz, 2H, 4-aminoquinoline), 8.38 (d,  $J$  = 4.0 Hz, 2H, 2-aminoquinoline), 8.13 (t,  $J$  = 7.0 Hz, 2H, 4-pyridinedicarboxaldehyde), 8.09 (d,  $J$  = 8.0 Hz, 2H, 3-pyridinedicarboxaldehyde next to the aniline), 7.87 (d,  $J$  = 8.5 Hz, 4H, aniline next to  $-\text{CO}_2\text{Et}$ ), 7.77 (d,  $J$  = 8.0 Hz, 2H, 5-aminoquinoline), 7.67 (dd,  $J$  = 8.5 Hz,  $J'$  = 5 Hz, 2H, 3-aminoquinoline), 7.49 (d,  $J$  = 7.5 Hz, 2H, 3-pyridinedicarboxaldehyde next to the quinoline), 7.28 (t,  $J$  = 8.0 Hz, 2H, 6-aminoquinoline), 7.14 (d,  $J$  = 7.5 Hz, 2H, 7-aminoquinoline), 7.0 (d,  $J$  = 8.5 Hz, 4H, aniline next to the imine), 4.32 (dd,  $J$  = 13.5 Hz,  $J'$  = 7.0 Hz, 4H,  $-\text{COOCH}_2\text{CH}_3$ ), 1.34 (t,  $J$  = 7.0 Hz, 6H,  $-\text{COOCH}_2\text{CH}_3$ ). **Head-to-head:**  $\delta$  = 9.31 (s, 2H, quinoline imine), 8.95 (s, 2H, aniline imine), 4.18 (dd,  $J$  = 13.5 Hz,  $J'$  = 7.0 Hz, 4H,  $-\text{COOCH}_2\text{CH}_3$ ), 1.26 (t,  $J$  = 7.0 Hz, 6H,  $-\text{COOCH}_2\text{CH}_3$ ). Aromatic signals were obscured by noise and peaks corresponding to the head-to-tail isomer. ESI-MS:  $m/z$  = 471.1 ( $[\text{M}]^{2+}$ ), 943.5 ( $[\text{M} - \text{Cu} + 2 \text{MeOH}]^+$ ), 1030.8 ( $[\text{M} + \text{BF}_4]^+$ ).

Amine J:

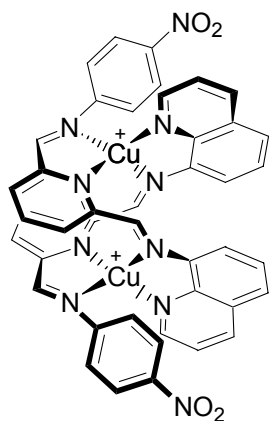

(+ Head to Head isomer)

$^1\text{H}$  NMR (400 MHz, 298 K, DMSO) **Head-to-tail:**  $\delta$  = 9.10 (s, 2H, quinoline imine), 9.09 (s, 2H, aniline imine), 8.47 (d,  $J$  = 8.0 Hz, 2H, 4-aminoquinoline), 8.37 (d,  $J$  = 4.5 Hz, 2H, 2-aminoquinoline), 8.14 (m, 2H, 4-pyridinedicarboxaldehyde, 2H, 3-pyridinedicarboxaldehyde next to the aniline, 4H, aniline next to the nitro), 7.77 (d,  $J$  = 8.0 Hz, 2H, 5-aminoquinoline), 7.67 (dd,  $J$  = 8.0 Hz,  $J'$  = 4.5 Hz, 2H, 3-aminoquinoline), 7.59 (d,  $J$  = 7.5 Hz, 2H, 3-pyridinedicarboxaldehyde next to the quinoline), 7.28 (t,  $J$  = 8.0 Hz, 2H, 6-aminoquinoline), 7.14 (d,  $J$  = 7.5 Hz, 2H, 7-aminoquinoline), 7.07 (d,  $J$  = 9.0 Hz, 4H, aniline next to the imine). **Head-to-head:**  $\delta$  = 9.24 (s, 2H, quinoline imine), 8.97 (s, 2H, aniline imine). Aromatic signals were obscured by noise and peaks corresponding to the head-to-tail isomer.

## Supplementary NMR Spectra of Key Compounds

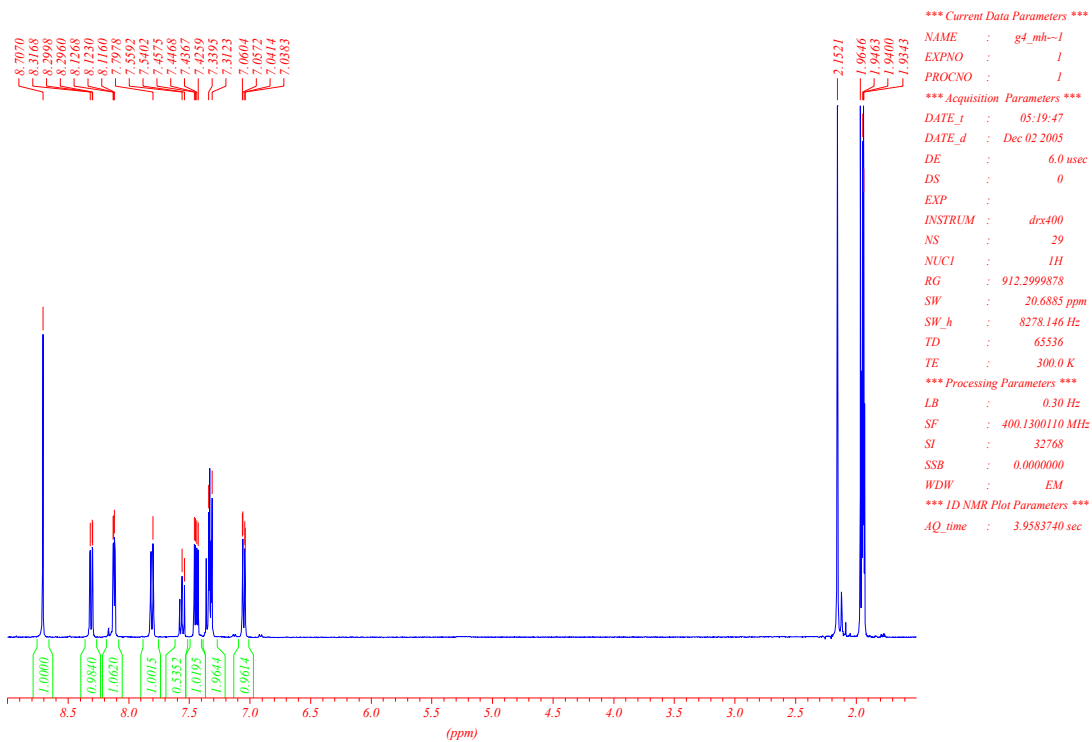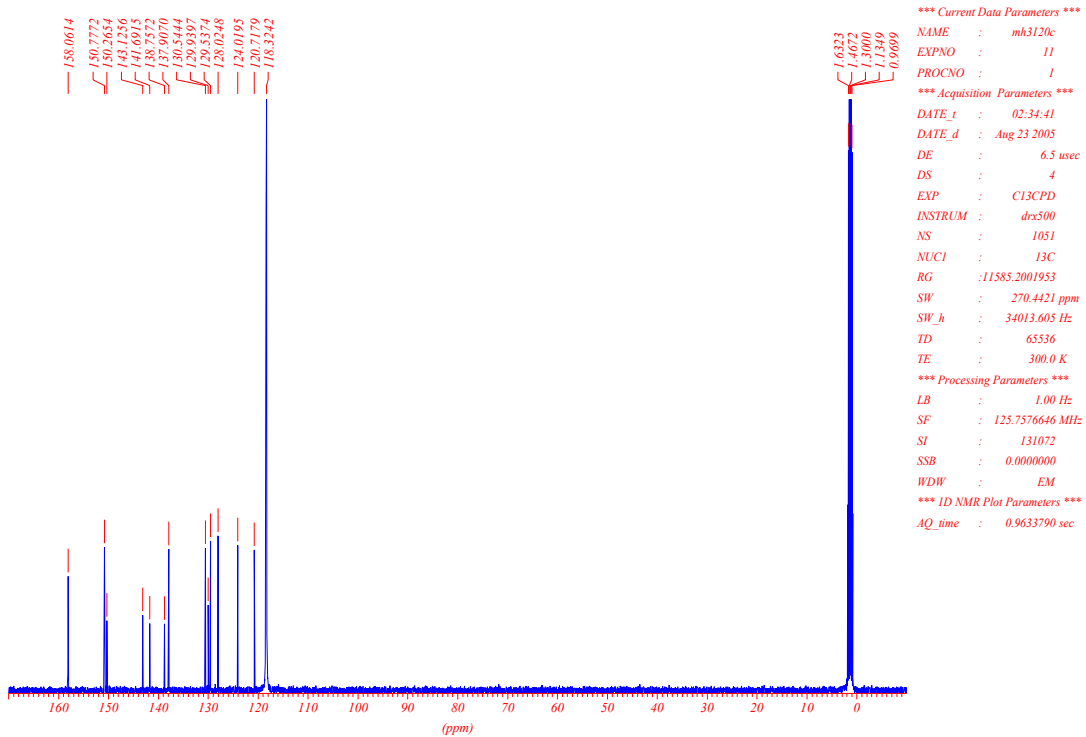

$^1\text{H}$  and  $^{13}\text{C}$  NMR spectra of **1** in  $\text{CD}_3\text{CN}$

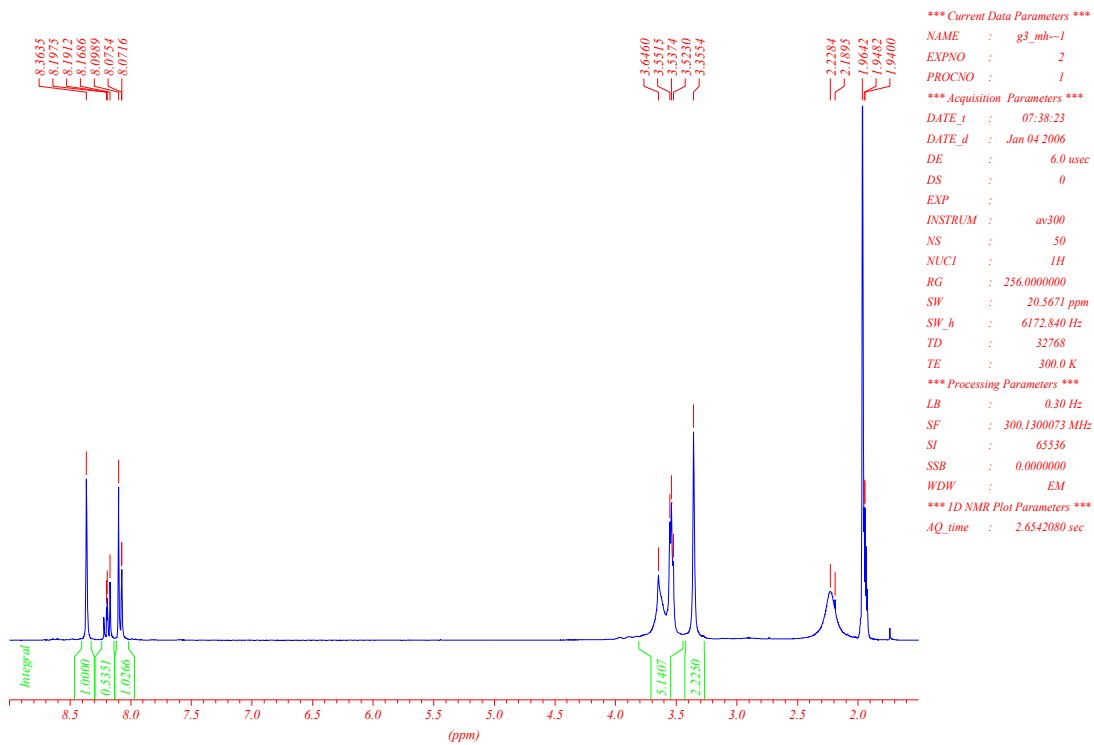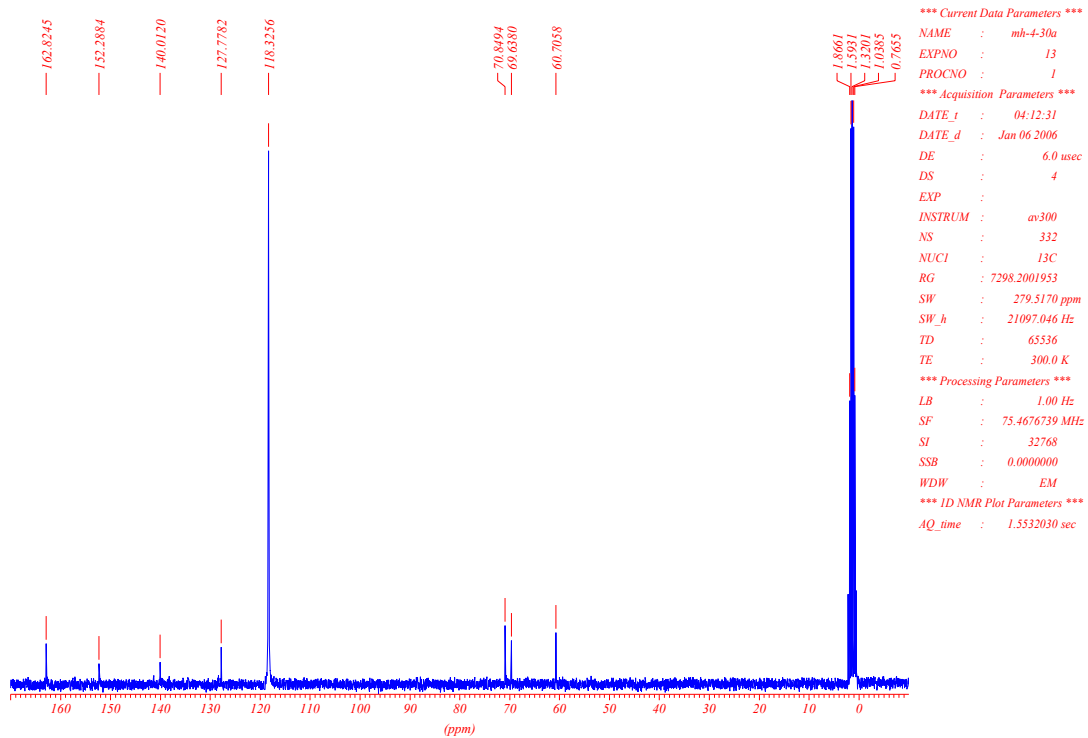

$^1\text{H}$  and  $^{13}\text{C}$  NMR spectra of **2** in  $\text{CD}_3\text{CN}$

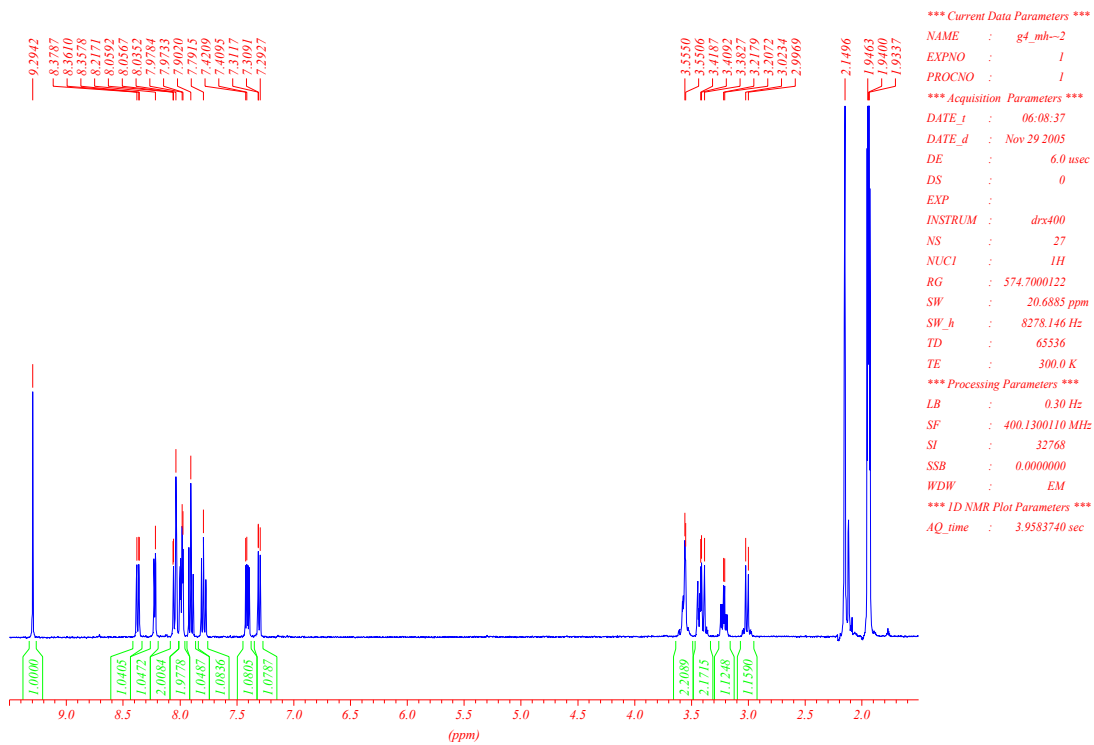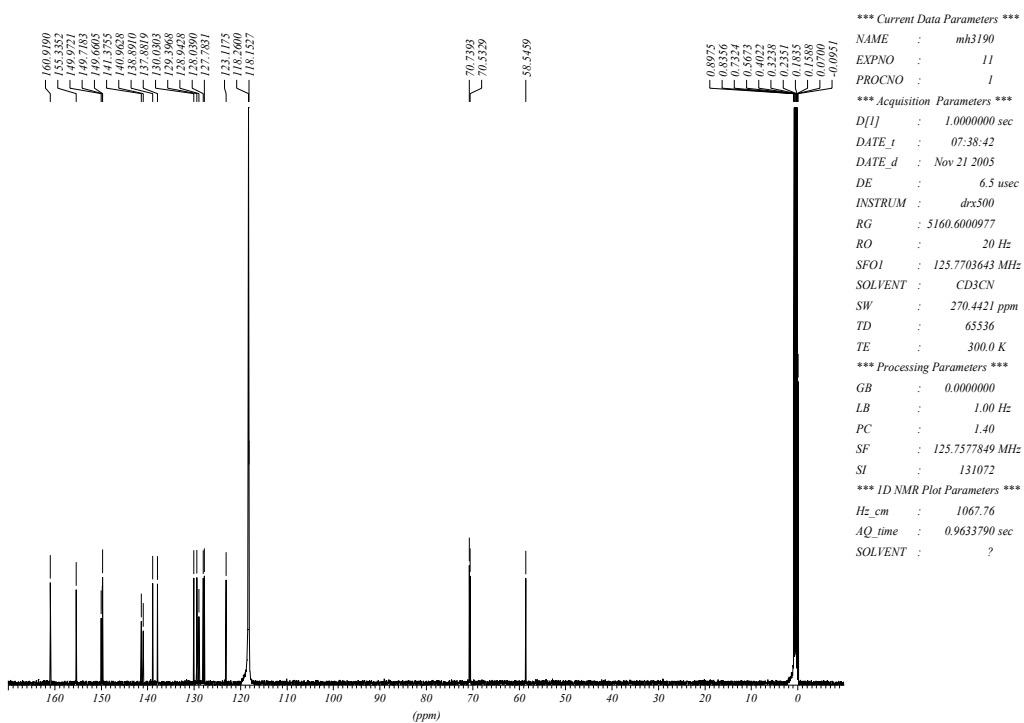

$^1\text{H}$  and  $^{13}\text{C}$  NMR spectra of **3** in  $\text{CD}_3\text{CN}$



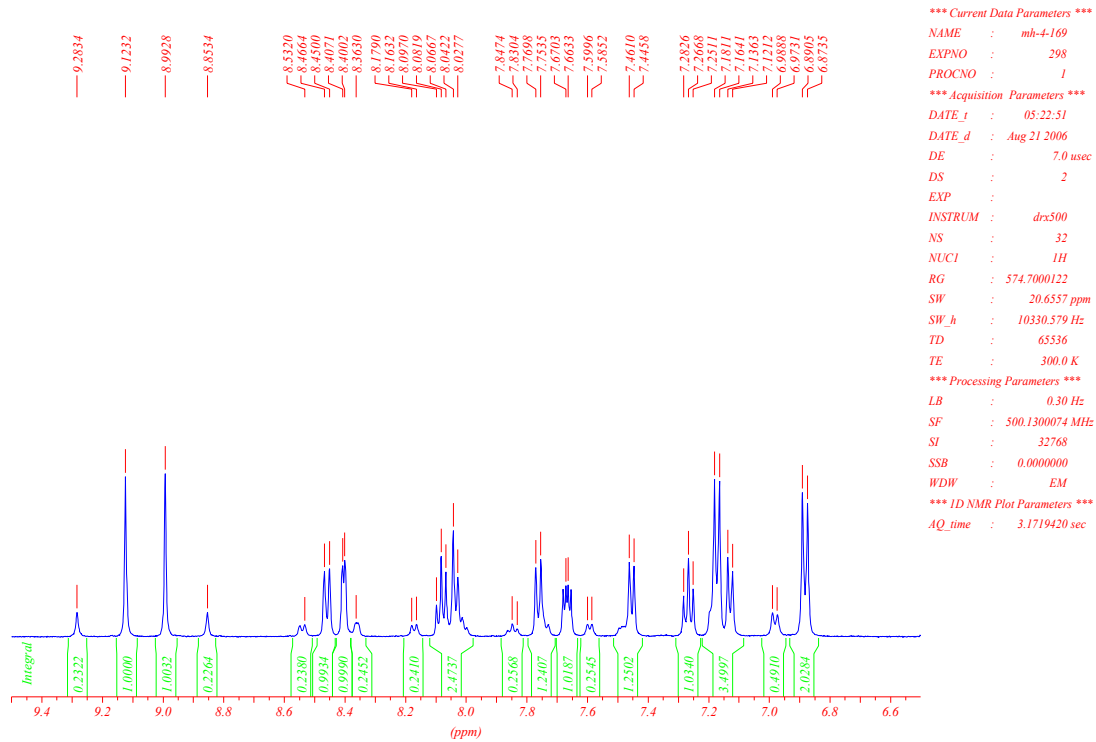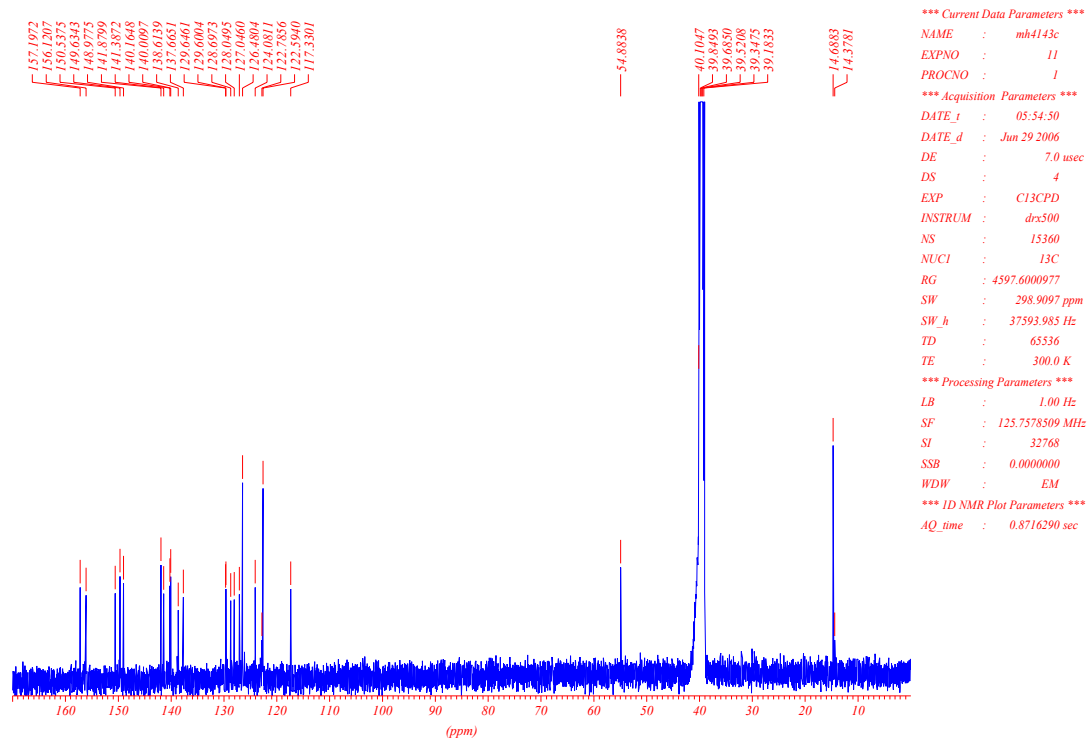

$^1\text{H}$  and  $^{13}\text{C}$  NMR spectra of the heterocomplex incorporating aniline **G** in DMSO at 298K

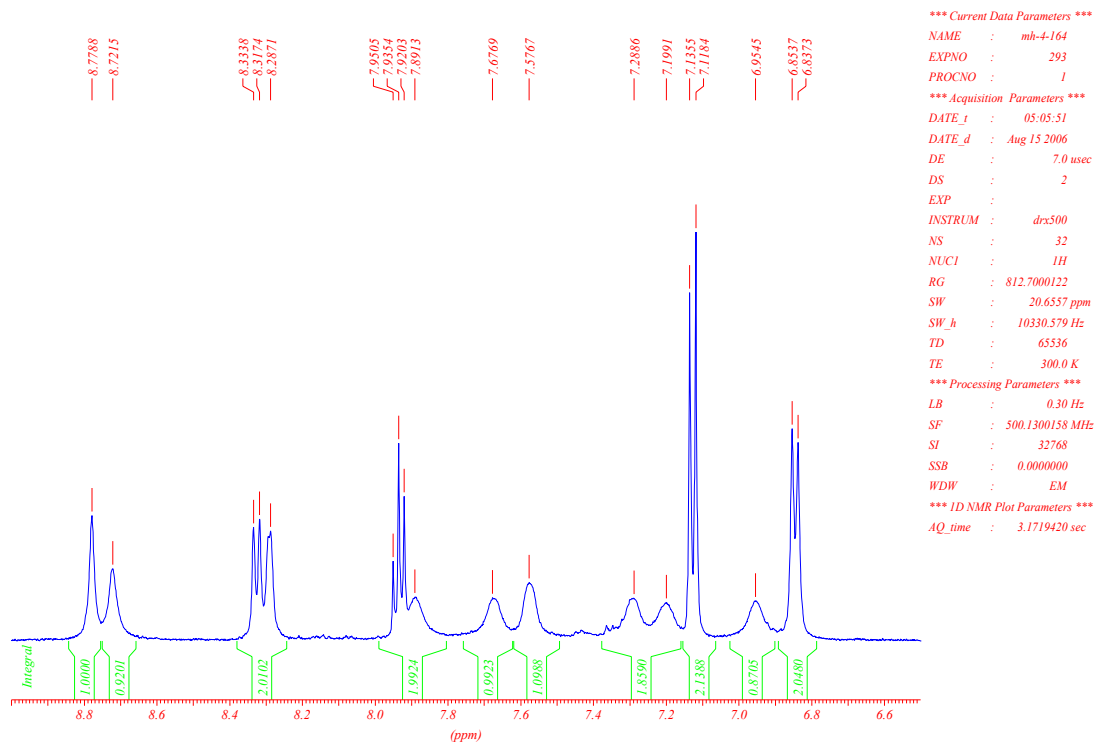

$^1\text{H}$  NMR spectrum of the heterocomplex incorporating aniline **G** in  $\text{CD}_3\text{CN}$
